# Supplementary material for: Correlated Electrostatic Mutations Provide a Reservoir of Stability in HIV Protease
Source: PLOS journal article supplement (doi:10.1371/journal.pcbi.1002675), 2012-09-06
Supplement: S10 (10.1371/journal.pcbi.1002675.s010) [file journal.pcbi.1002675.s010]

**Table S3**

| <b>Residues</b> | <b>Charges</b> | <b>Distance</b> | <b>Enhanced or Suppressed</b> | <b>Deviation</b> |
|-----------------|----------------|-----------------|-------------------------------|------------------|
| 30–88           | 0,-            | 6               | enhanced                      | 1910             |
| 20–35           | 0,0            | 11              | enhanced                      | 126              |
| 16–63           | -,+            | 8               | enhanced                      | 118              |
| 18–20           | +,0            | 5               | enhanced                      | 91               |
| 20–92           | 0,+            | 21              | enhanced                      | 75               |
| 63–70           | +,-            | 7               | enhanced                      | 56               |
| 20–88           | 0,-            | 18              | enhanced                      | 53               |
| 20–58           | 0,-            | 20              | enhanced                      | 53               |
| 16–37           | -,-            | 9               | suppressed                    | 48               |
| 63–70           | +,0            | 7               | enhanced                      | 46               |
